# Supplementary material for: Leptospirosis diagnosis among patients suspected of dengue fever in Brazil
Source: PubMed Central journal article supplement (PMC7996315; doi:10.1590/1678-9199-jvatitd-2020-0118), 2021-03-26
Supplement: 1678-9199-jvatitd-27-e20200118-s1.pdf [file 1678-9199-jvatitd-27-e20200118-s1.pdf]

## Supplementary Material to “Leptospirosis diagnosis among patients suspected of dengue fever in Brazil”

**Additional file 1.** Leptospirosis diagnosis among patients suspected of dengue fever in Brazil. Number of patients tested and positive results for leptospirosis diagnosis according to the municipality of origin in the central region of São Paulo state, Brazil.

| Municipality name  | Number of patients |                 |
|--------------------|--------------------|-----------------|
|                    | Tested             | Positive (test) |
| Águas de São Pedro | 1                  | 0               |
| Agudos             | 114                | 2 (MAT)         |
| Araçatuba          | 1                  | 1 (MAT)         |
| Araraquara         | 1                  | 0               |
| Arealva            | 26                 | 0               |
| Avai               | 3                  | 0               |
| Balbinos           | 14                 | 0               |
| Bariri             | 27                 | 0               |
| Barra Bonita       | 110                | 1 (PCR)         |
| Bastos             | 1                  | 0               |
| Bauru              | 349                | 3 (MAT)         |
| Bocaina            | 17                 | 0               |
| Boracéia           | 25                 | 0               |
| Borebi             | 6                  | 0               |
| Botucatu           | 1                  | 0               |
| Brotas             | 84                 | 0               |
| Cabrália Paulista  | 6                  | 0               |
| Cafelândia         | 43                 | 0               |
| Dois Córregos      | 55                 | 1 (MAT)         |
| Duartina           | 15                 | 1 (MAT)         |
| Getulina           | 9                  | 0               |
| Guaiçara           | 51                 | 0               |
| Iacanga            | 23                 | 0               |
| Ibitinga           | 1                  | 0               |

| Municipality name | Number of patients |                 |
|-------------------|--------------------|-----------------|
|                   | Tested             | Positive (test) |
| Igaraçu do Tietê  | 129                | 0               |
| Ipaussu           | 1                  | 0               |
| Itajú             | 8                  | 0               |
| Itapuí            | 22                 | 0               |
| Jaú               | 292                | 5 (MAT)         |
| Lençóis Paulista  | 68                 | 1 (MAT)         |
| Lins              | 157                | 2 (MAT)         |
| Lucianópolis      | 17                 | 0               |
| Macatuba          | 48                 | 0               |
| Mineiros do Tietê | 37                 | 0               |
| Pederneiras       | 54                 | 1 (MAT)         |
| Pirajuí           | 40                 | 0               |
| Piratininga       | 37                 | 2 (MAT)         |
| Pongá             | 6                  | 0               |
| Pratânia          | 1                  | 0               |
| Presidente Alves  | 18                 | 0               |
| Promissão         | 40                 | 0               |
| Reginópolis       | 15                 | 0               |
| Ribeirão Preto    | 1                  | 0               |
| Sabino            | 15                 | 0               |
| São Paulo         | 3                  | 0               |
| Torrinha          | 14                 | 1 (MAT)         |
| Uru               | 10                 | 0               |
| Vera Cruz         | 1                  | 0               |
| <b>Total</b>      | <b>2017</b>        | <b>21</b>       |

MAT: microscopic agglutination test
